# Supplementary material for: Inhibition of CDC20 suppresses the development and progression of mantle cell lymphoma through PI3K/AKT pathway
Source: Research Square preprint supplement (doi:10.21203/rs.3.rs-7114313/v1), 2025-07-28

## Supplementary Materials

Figure 2E Z138 cleaved caspase-3

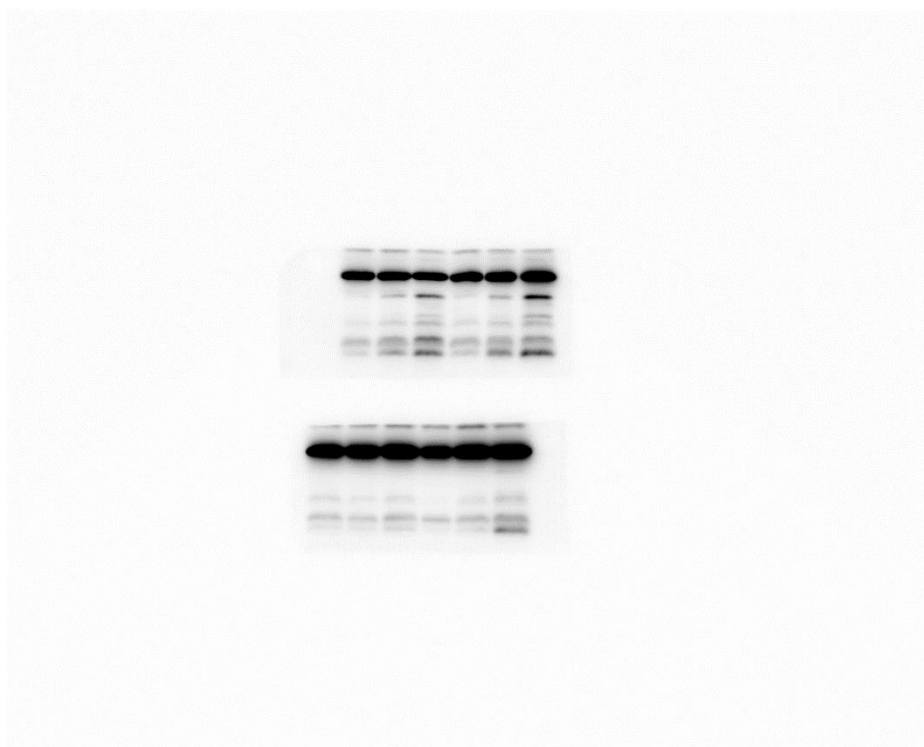

Figure 2E Z138 cleaved caspase-9

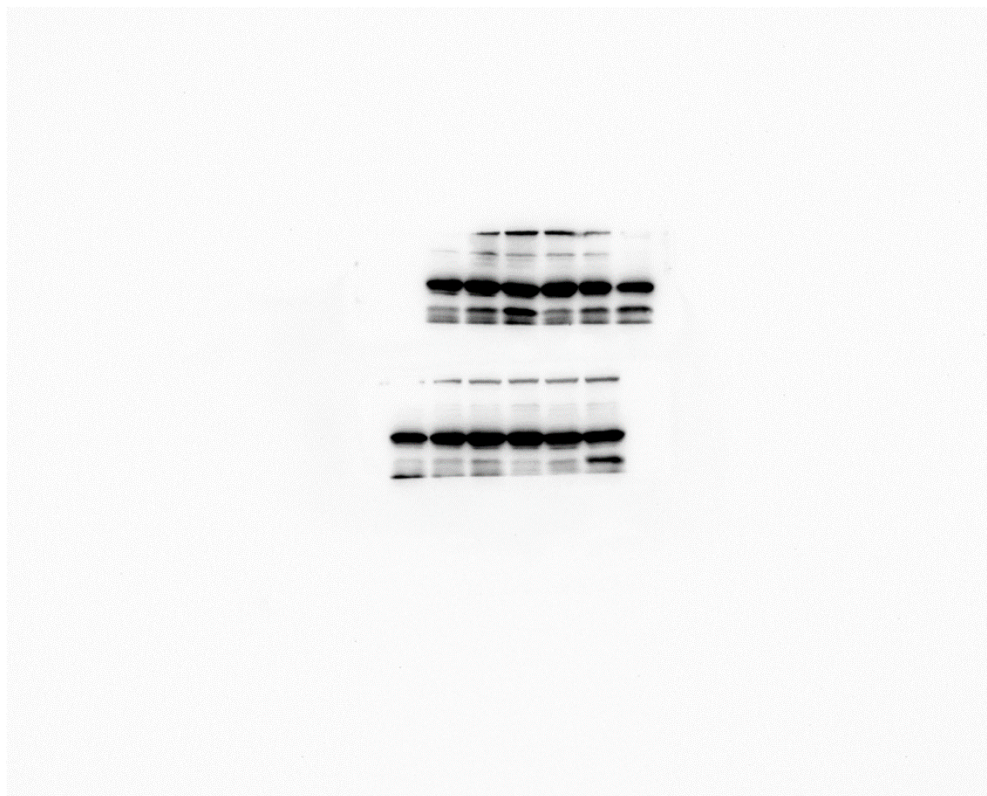

Figure 2E Z138 cleaved PARP

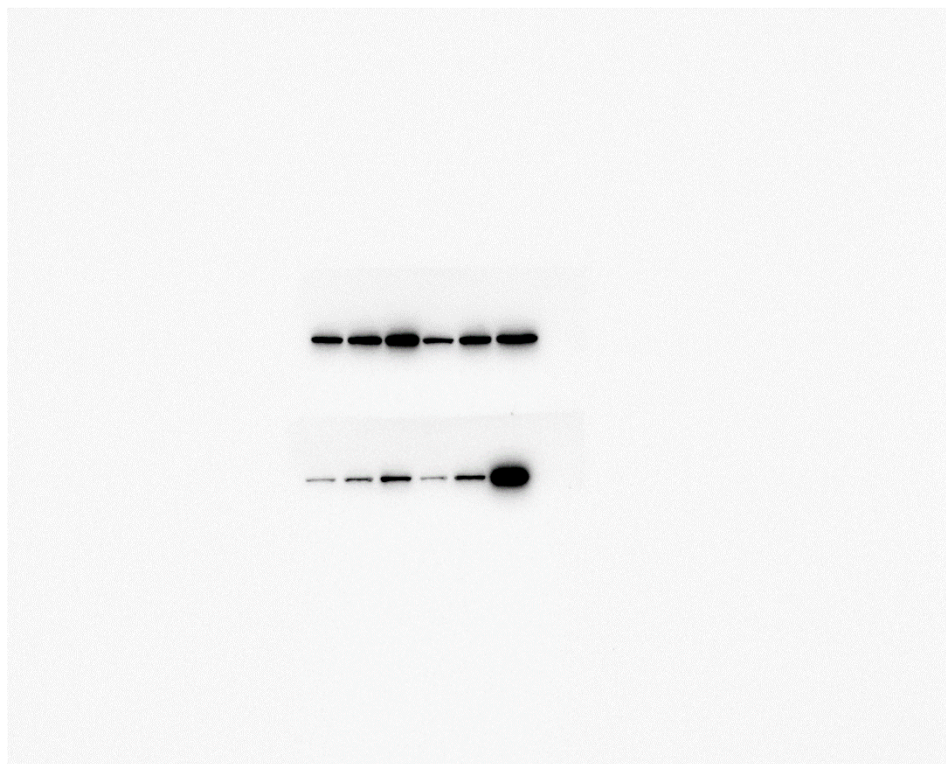

Figure 2E Z138 actin

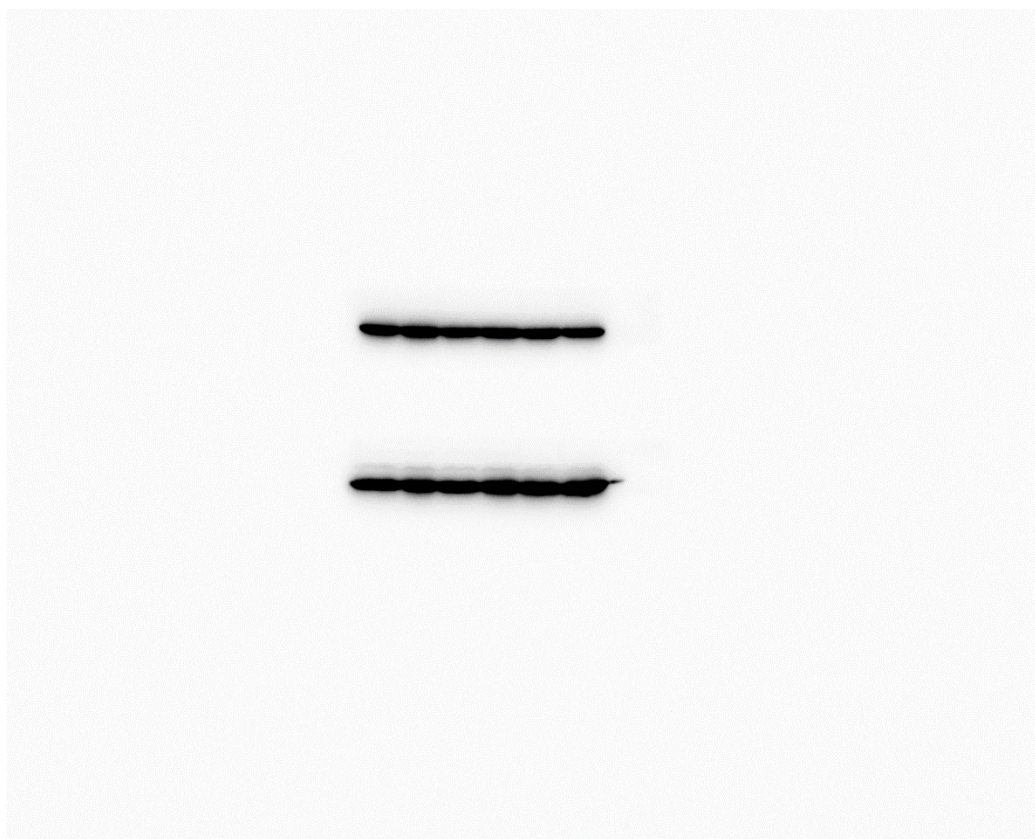

Figure 2E Mino cleaved caspase-3

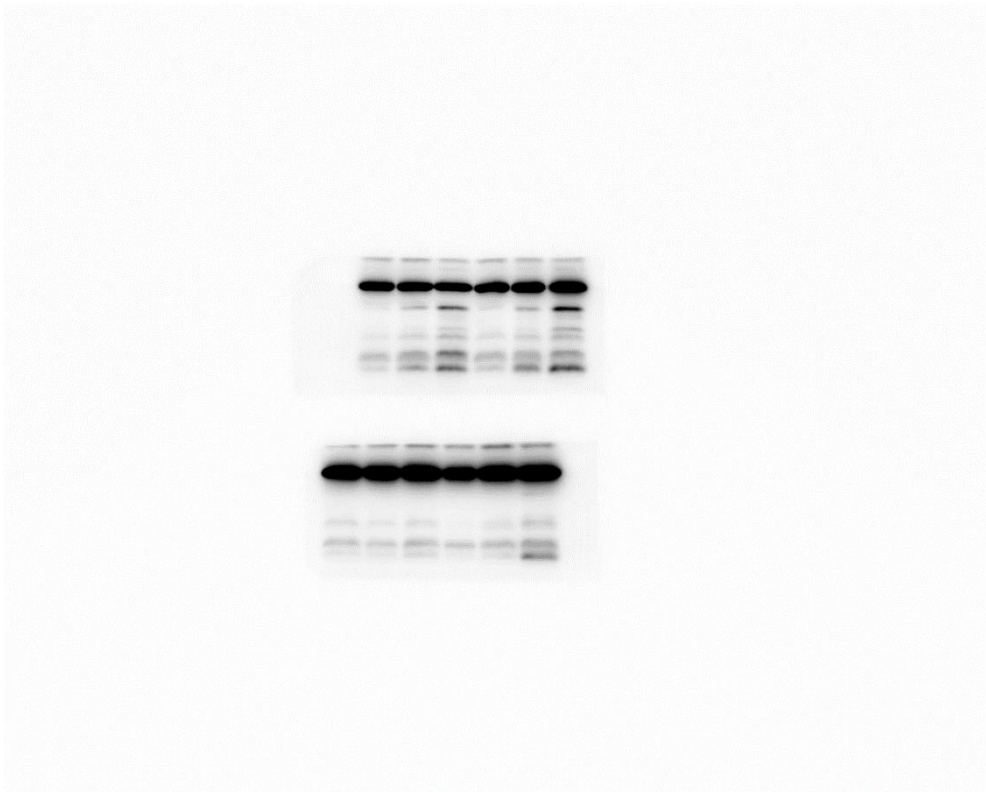



Figure 2E Mino cleaved caspase-9

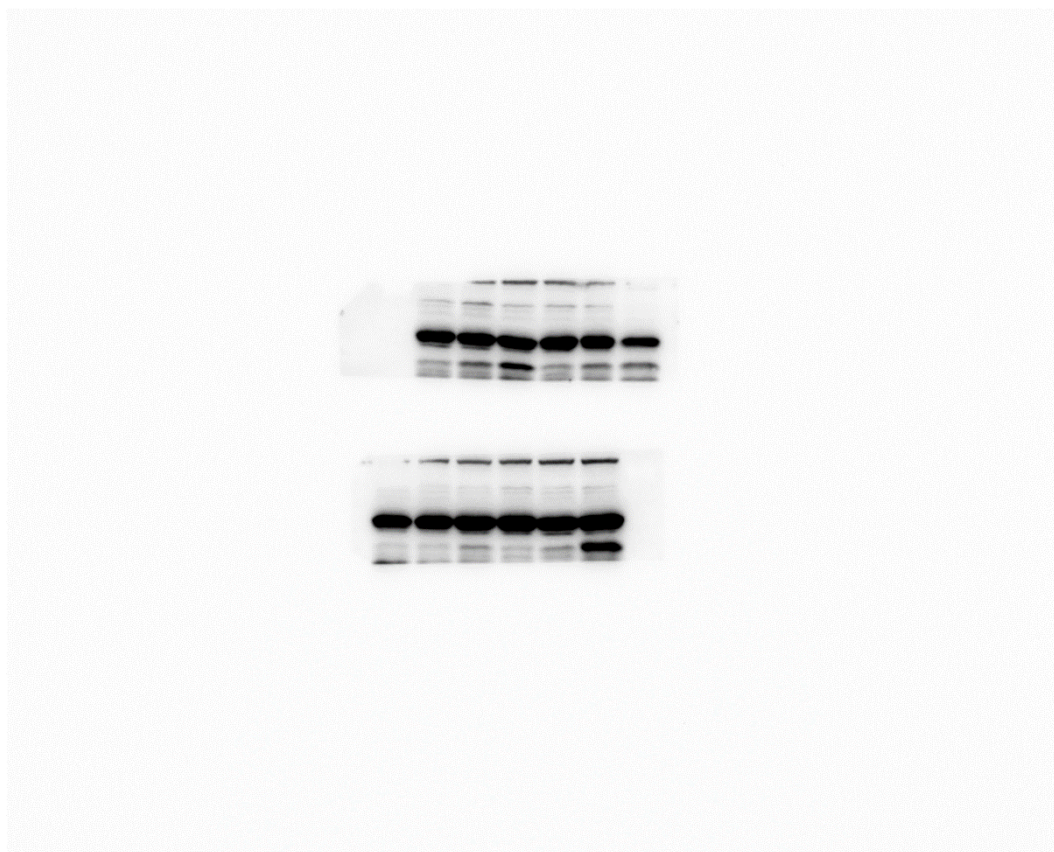

Figure 2E Mino cleaved PARP

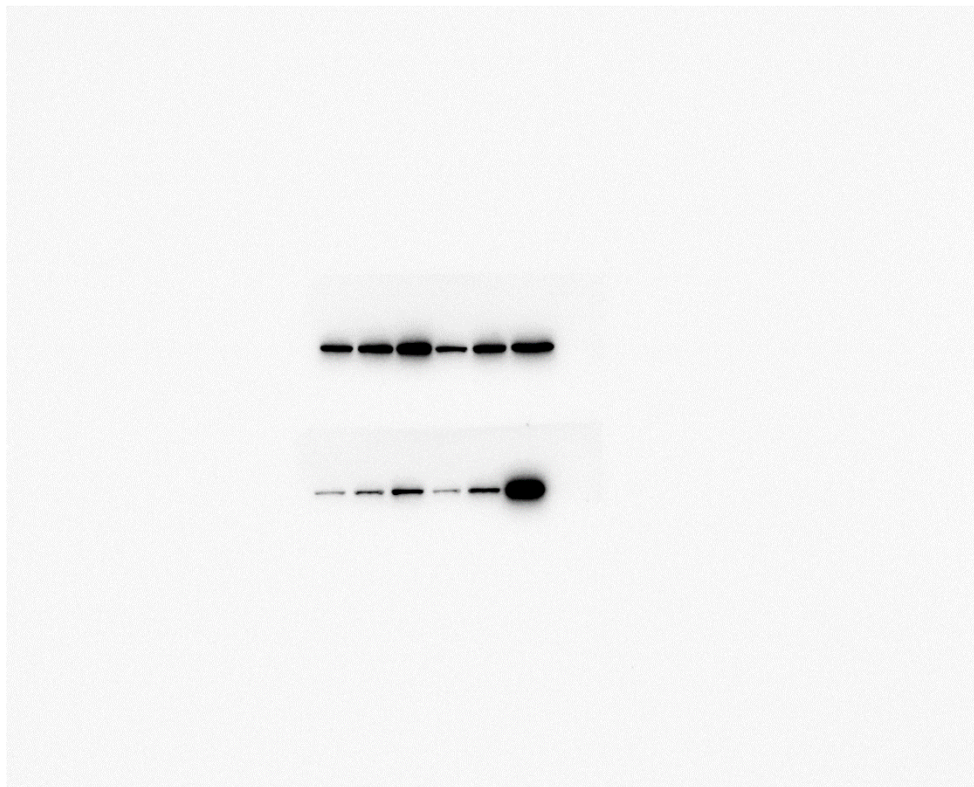

Figure 2E Mino actin

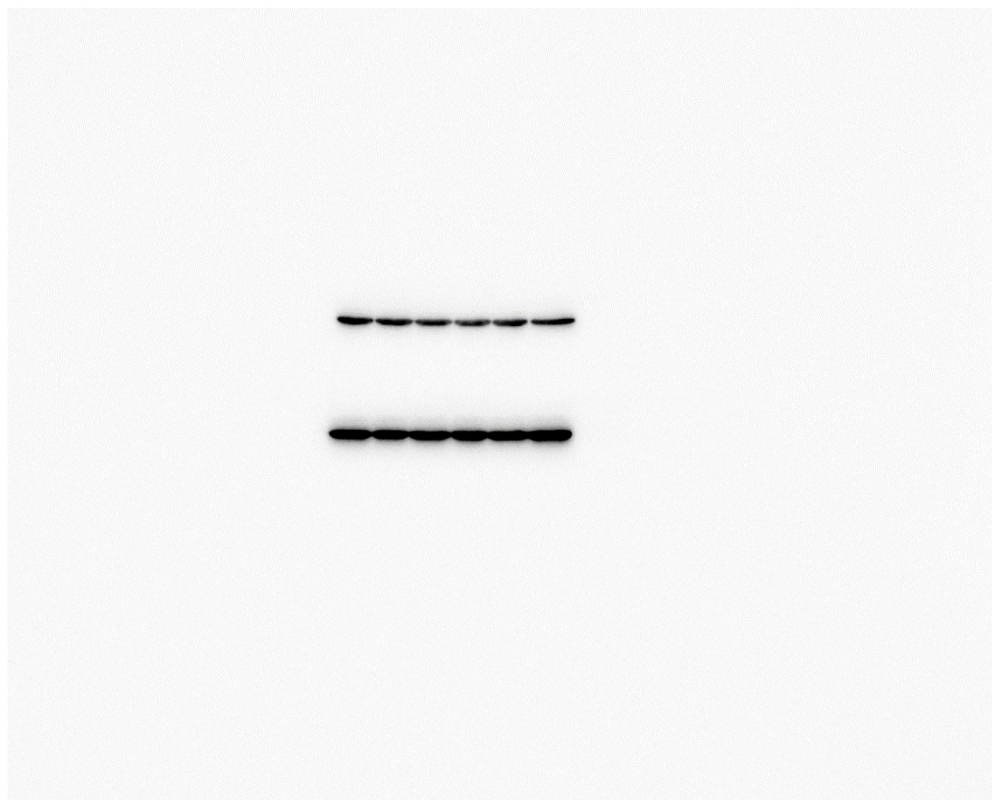



Figure 2E Rec1 cleaved caspase-3

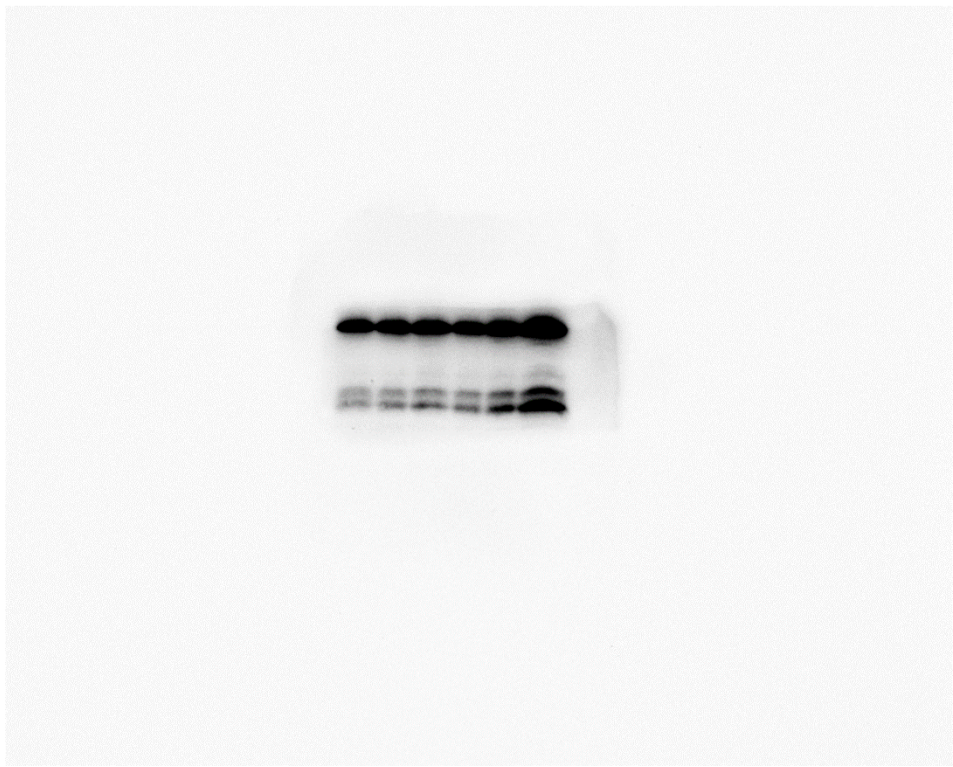

Figure 2E Rec1 cleaved caspase-9

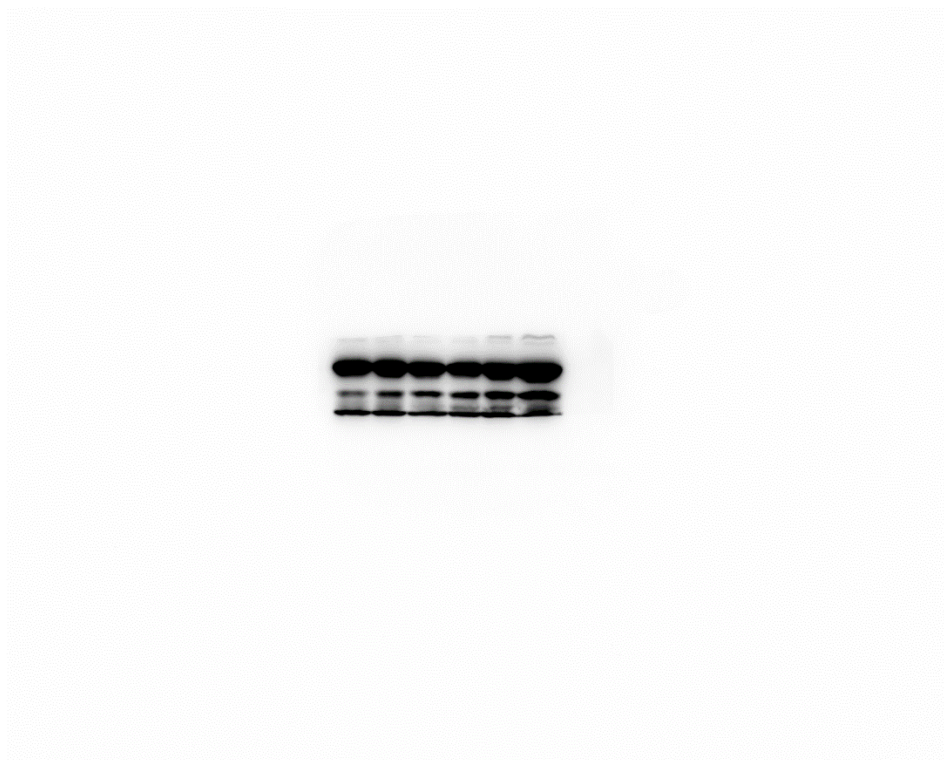

Figure 2E Rec1 cleaved PARP

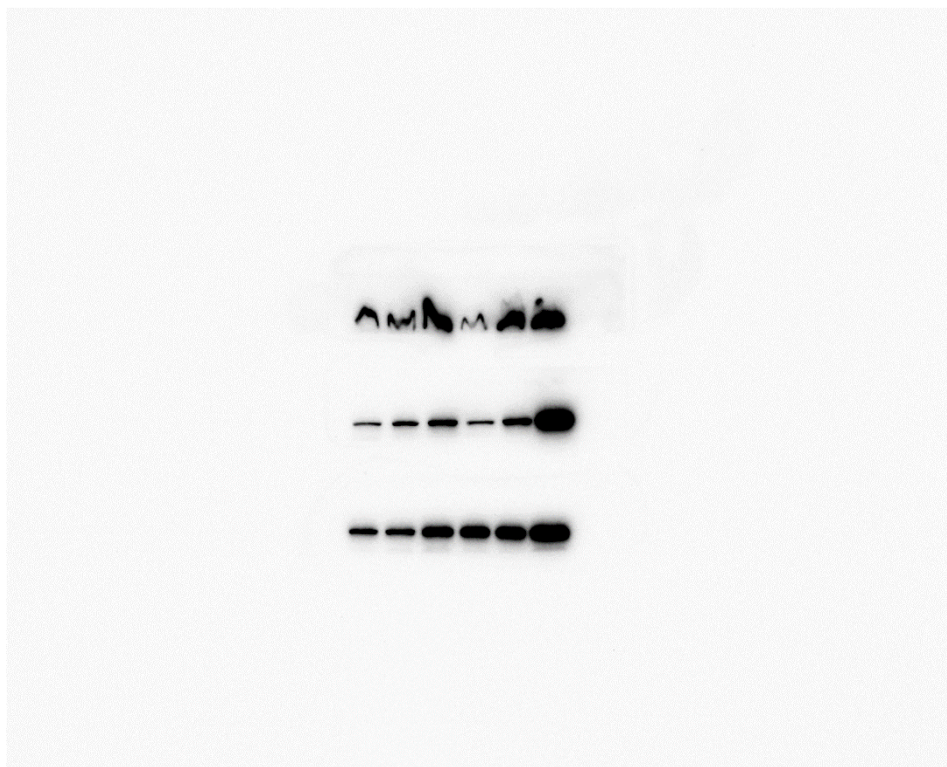

Figure 2E Rec1 actin

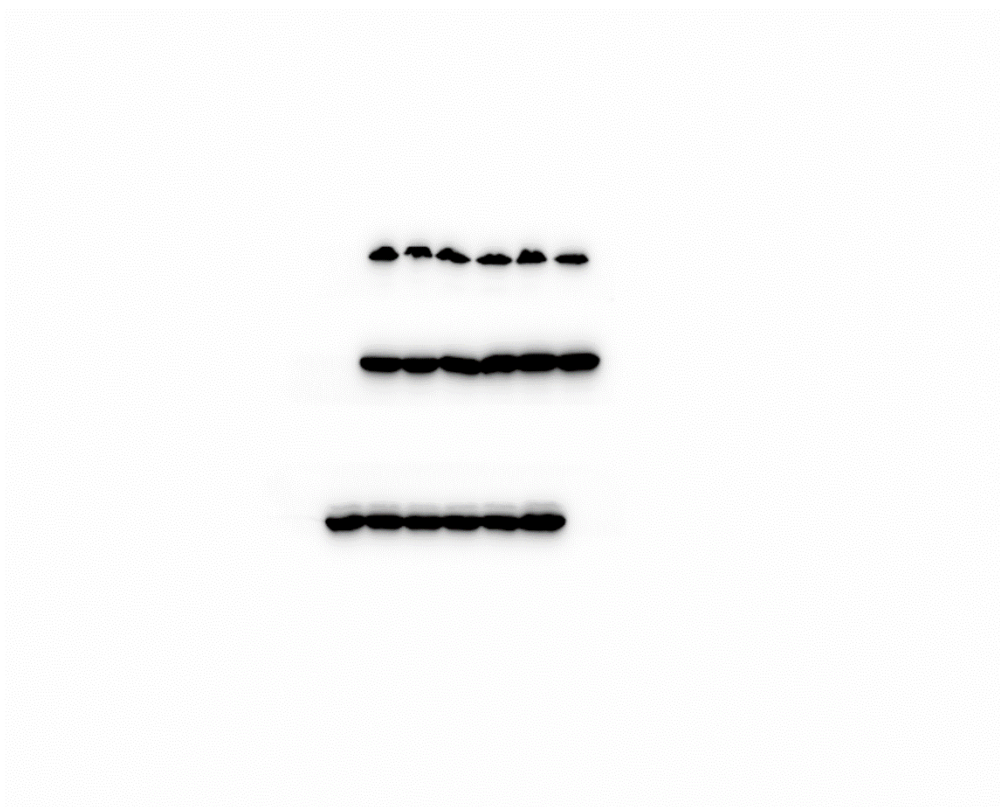

Figure 2I Z138 MMP2

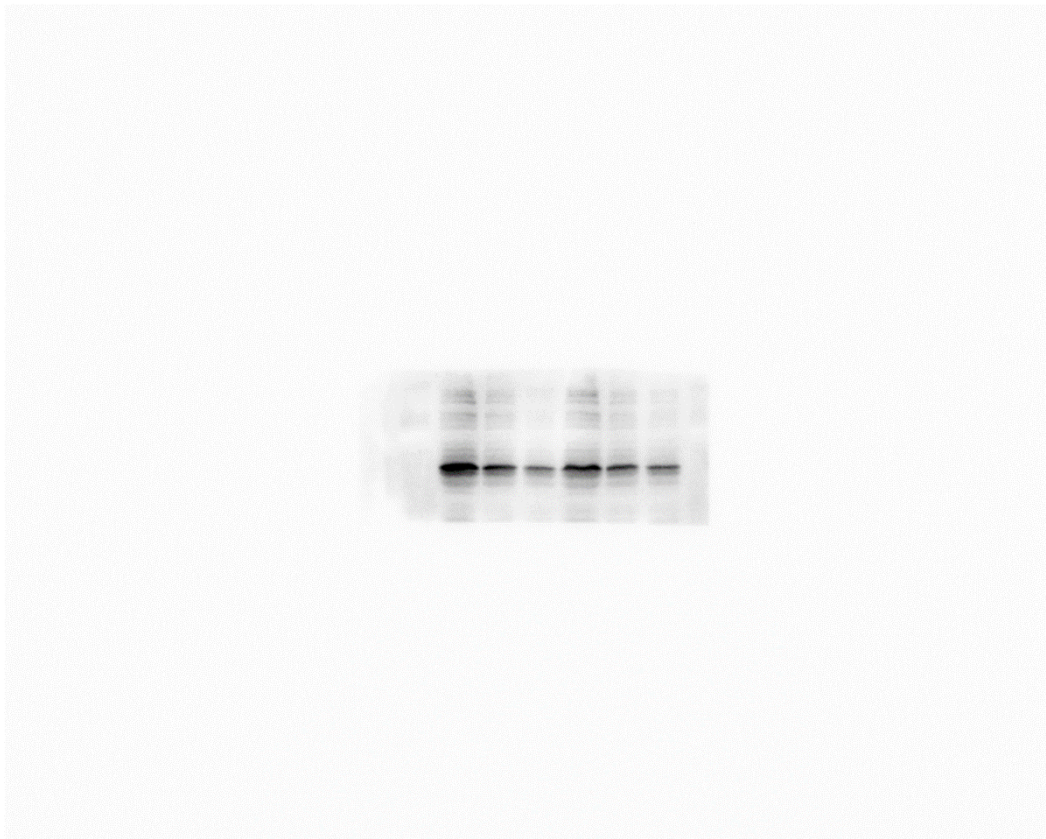



Figure 2I Z138 MMP9

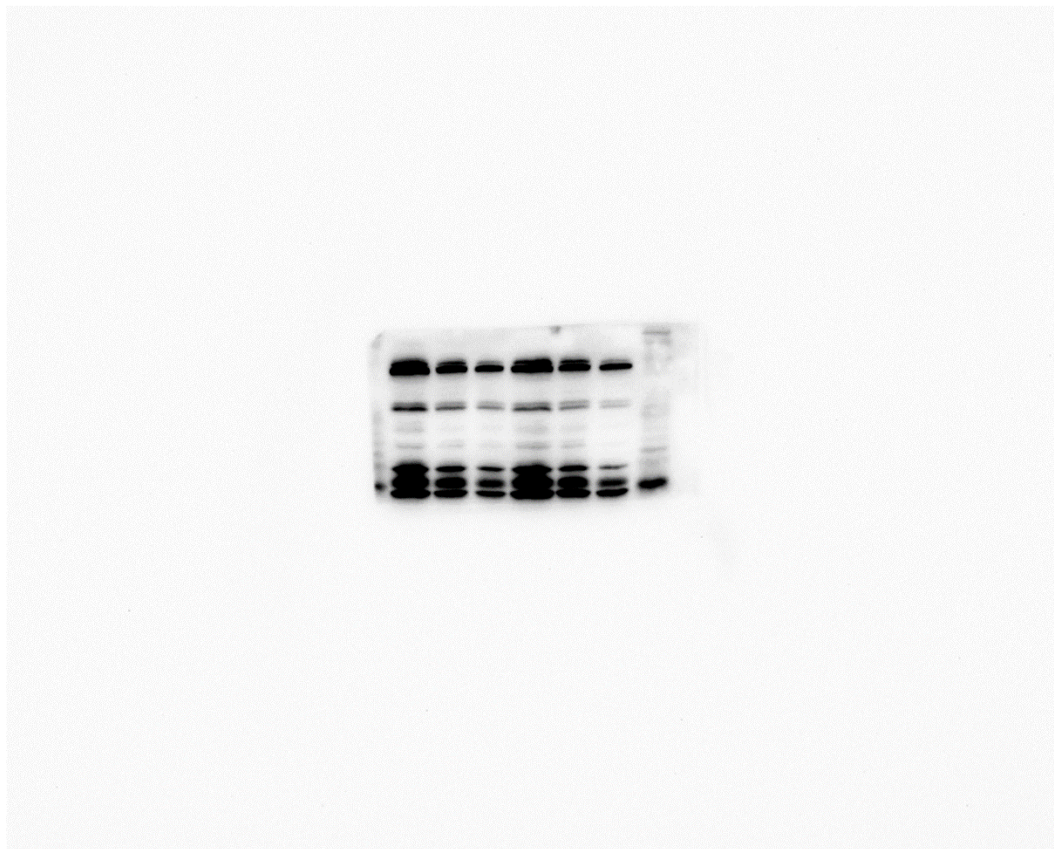

Figure 2I Z138 actin

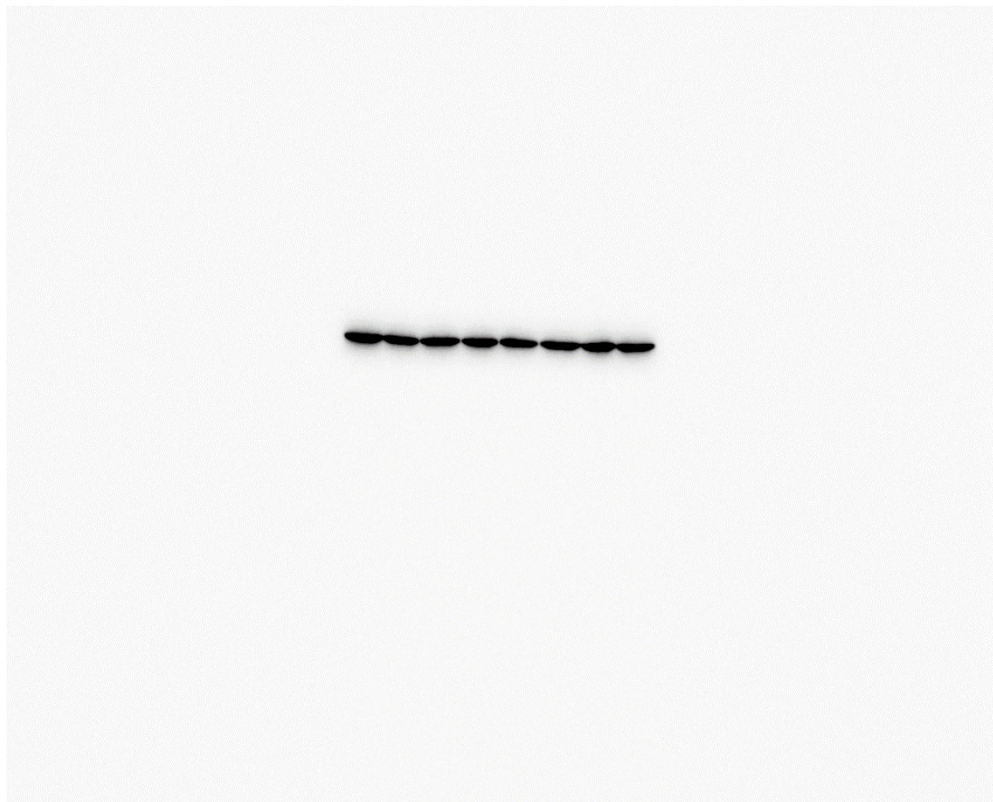

Figure 3A shZ138 CDC20

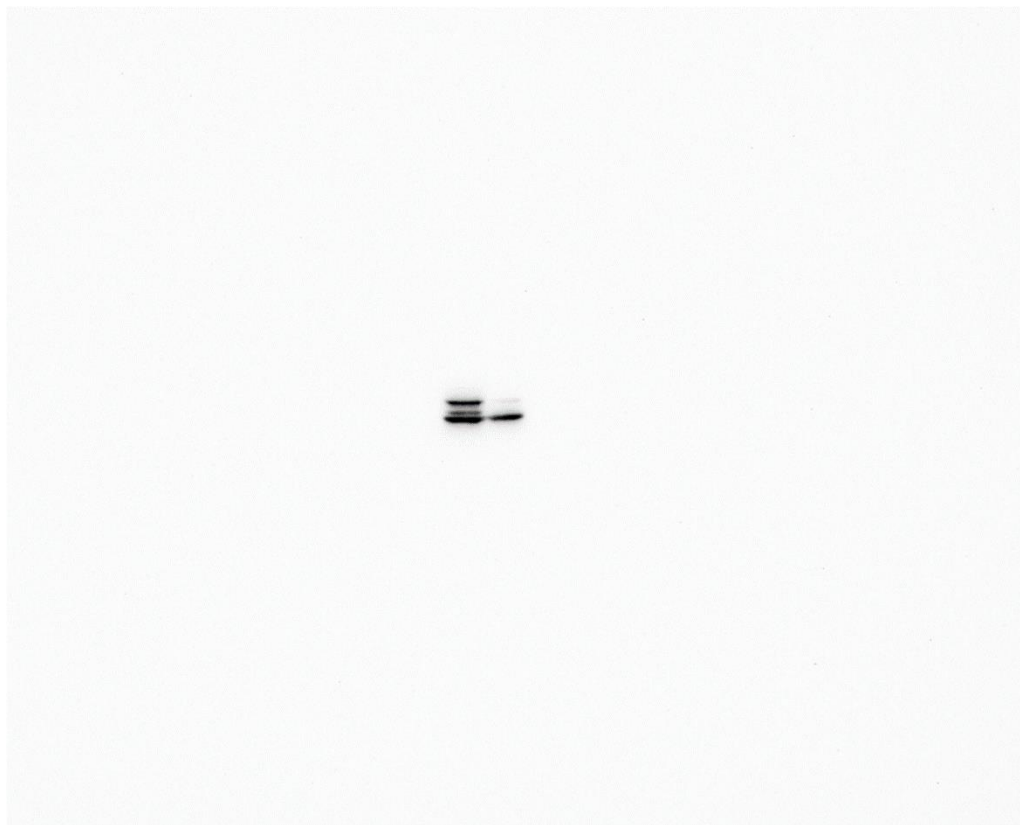

Figure 3A shZ138 actin

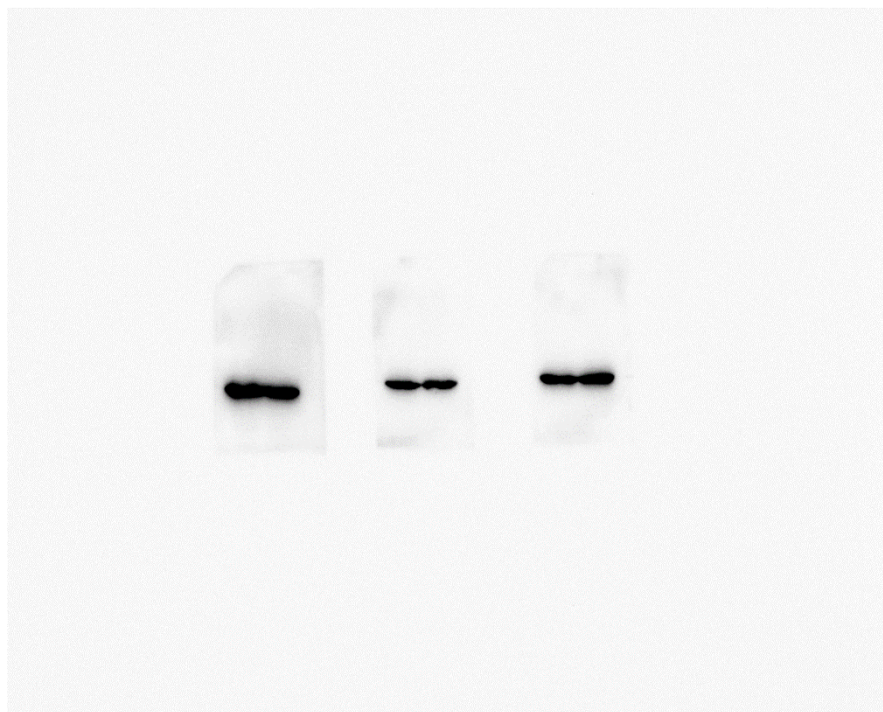

Figure 3C shZ138 cleaved caspase-3

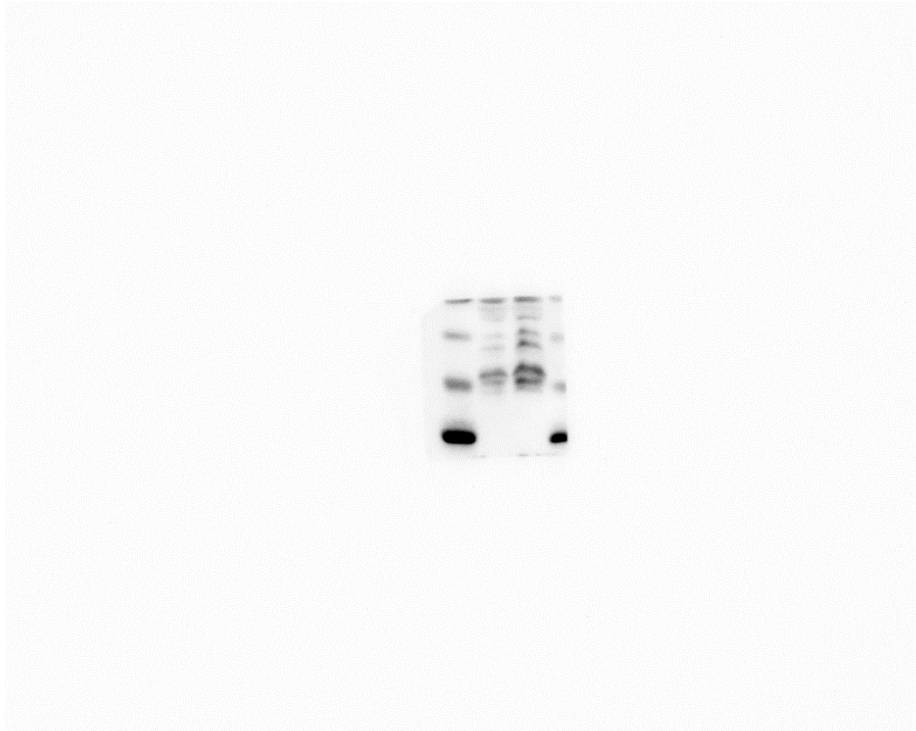



Figure 3C shZ138 cleaved caspase-9

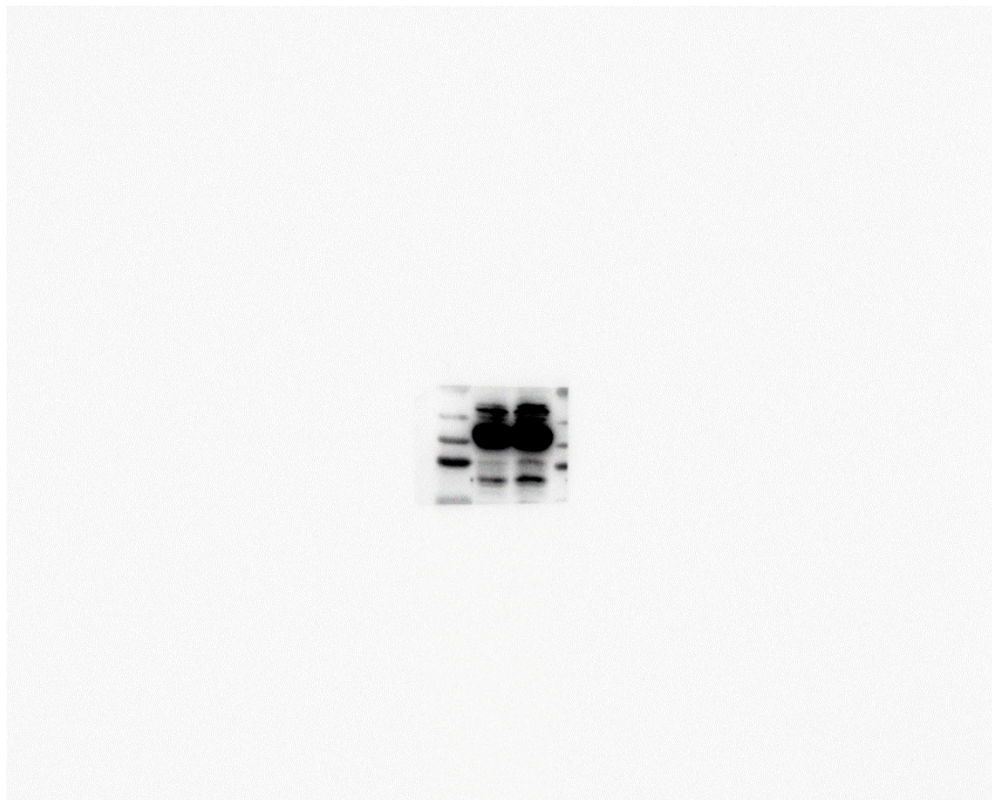

Figure 3C shZ138 cleaved PARP

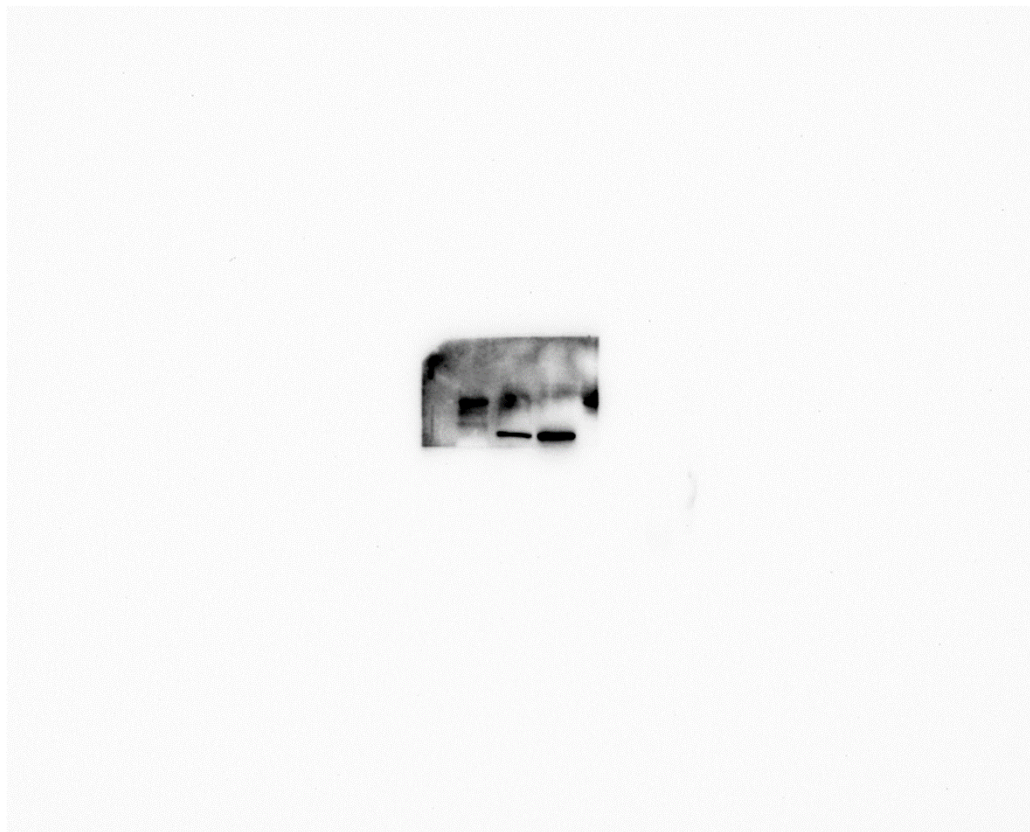

Figure 3C shZ138 actin

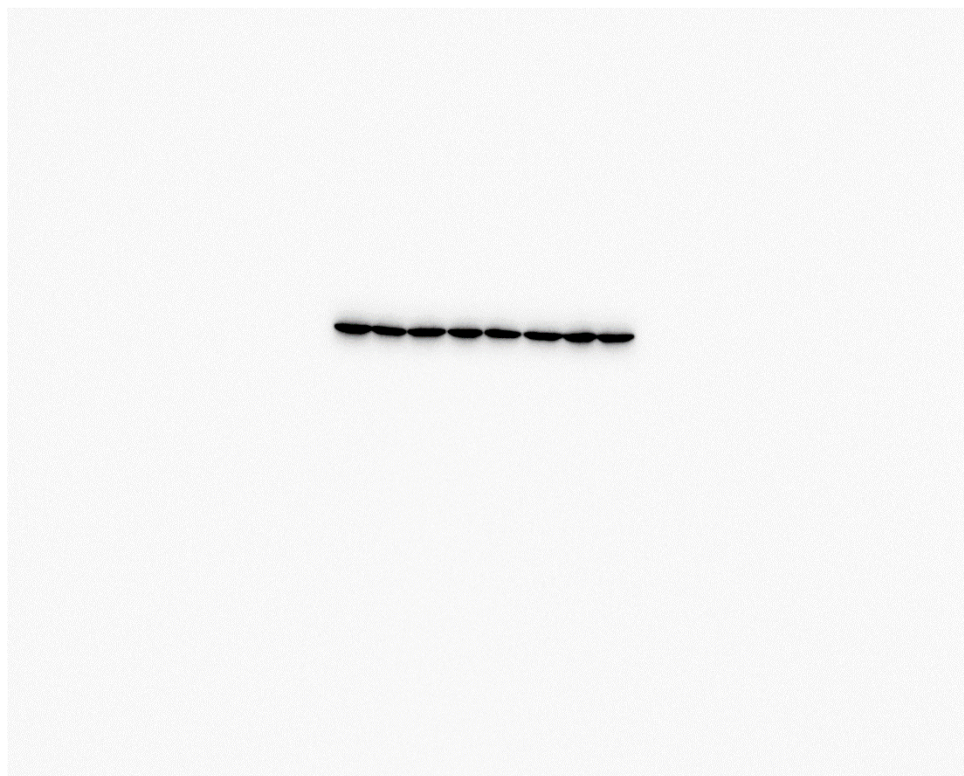

Figure 3E shZ138 MMP2

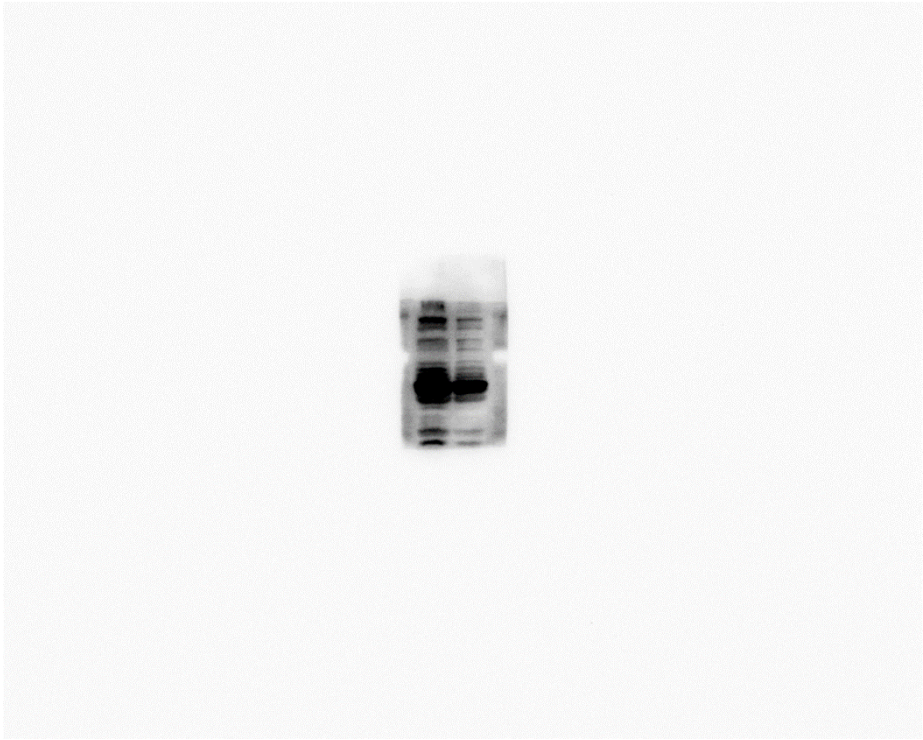



Figure 3E shZ138 MMP9

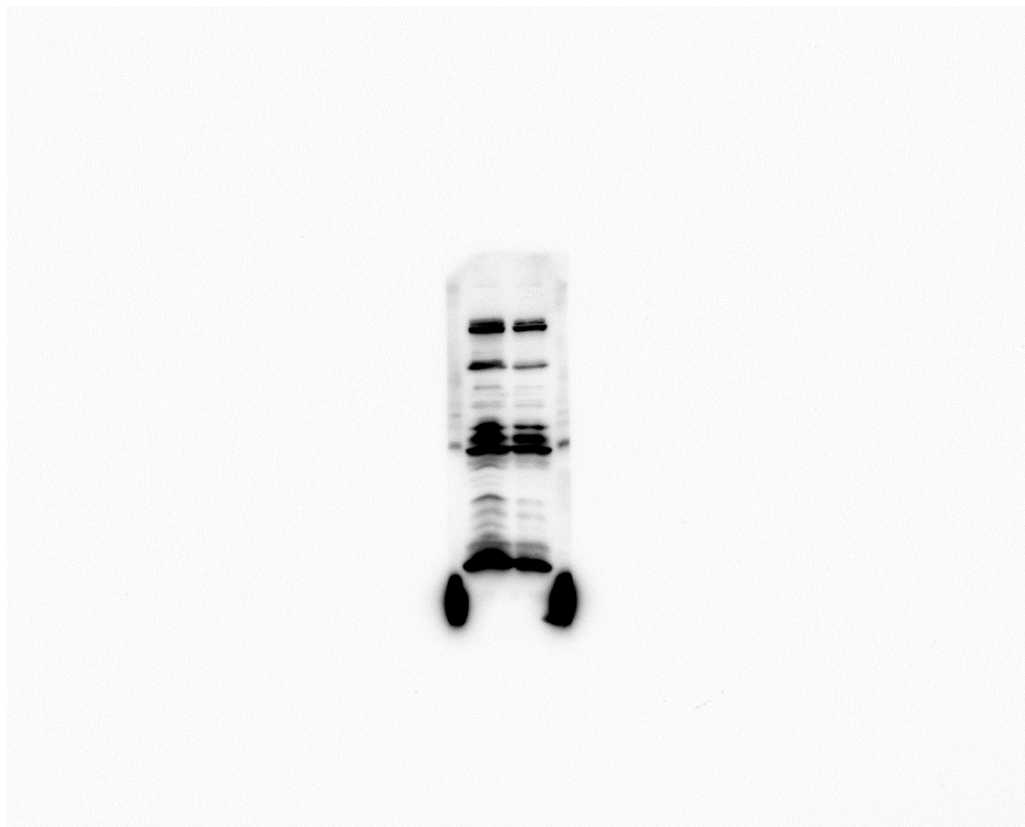



Figure 3E shZ138 actin

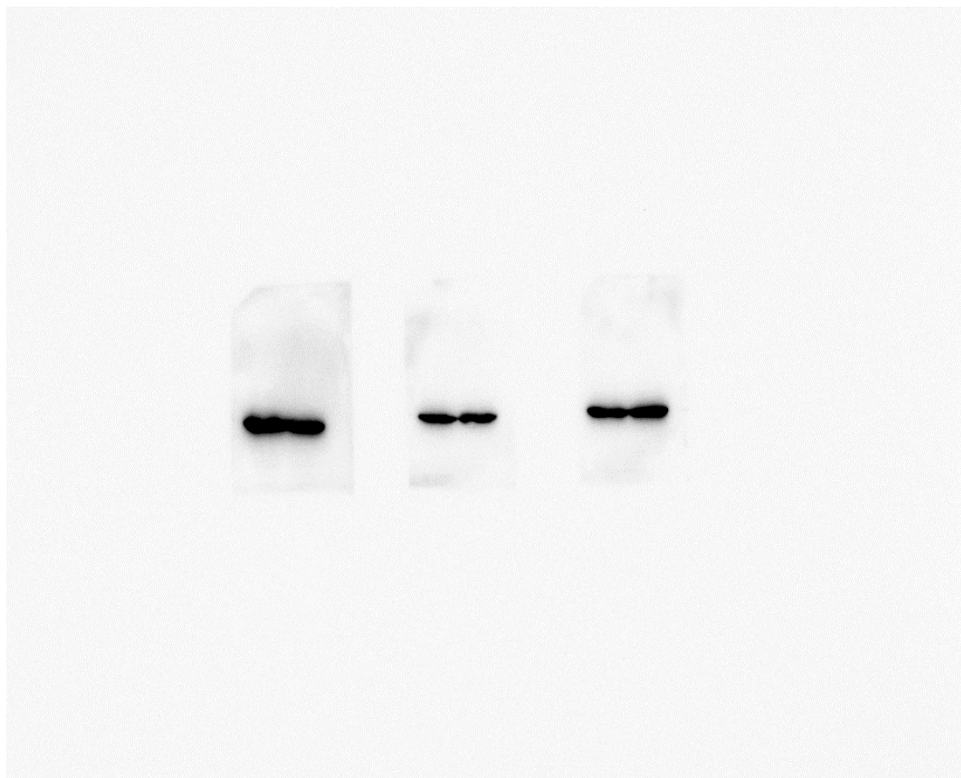

Figure 4L mice CDC20

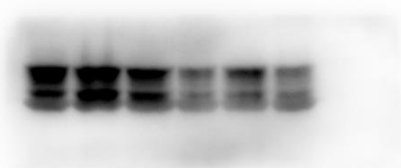

Figure 4L mice cleaved PARP

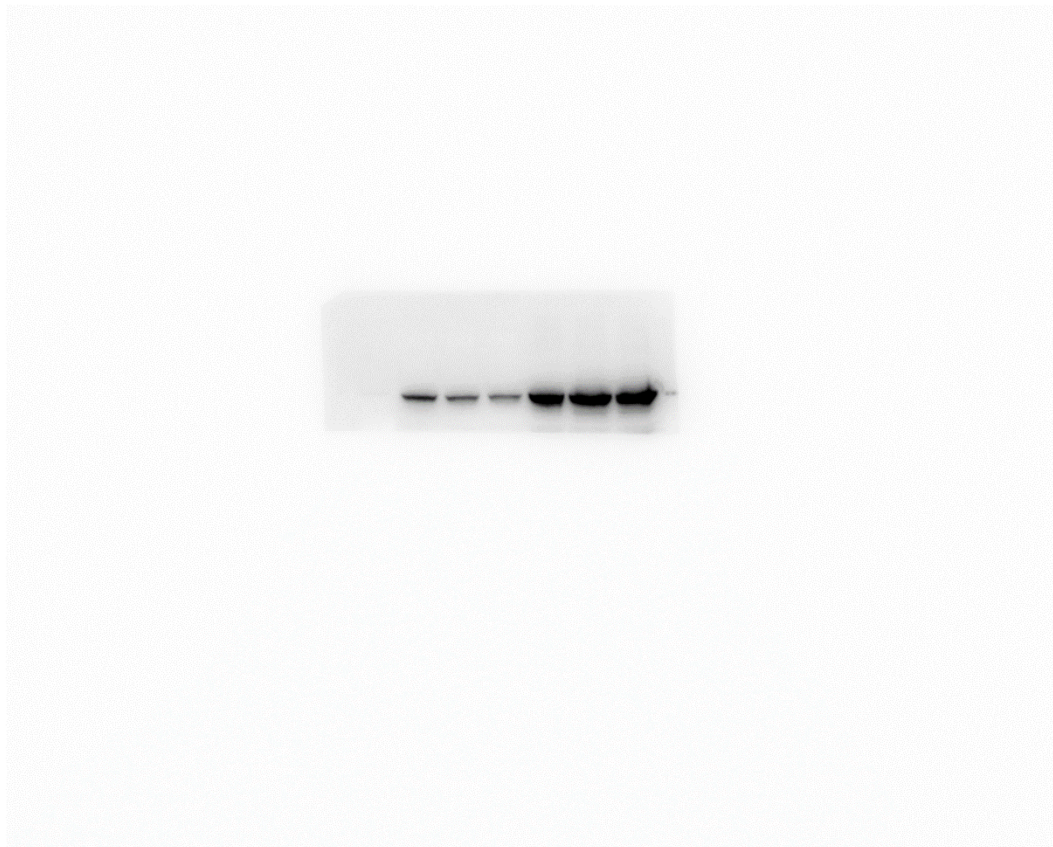

Figure 4L mice actin

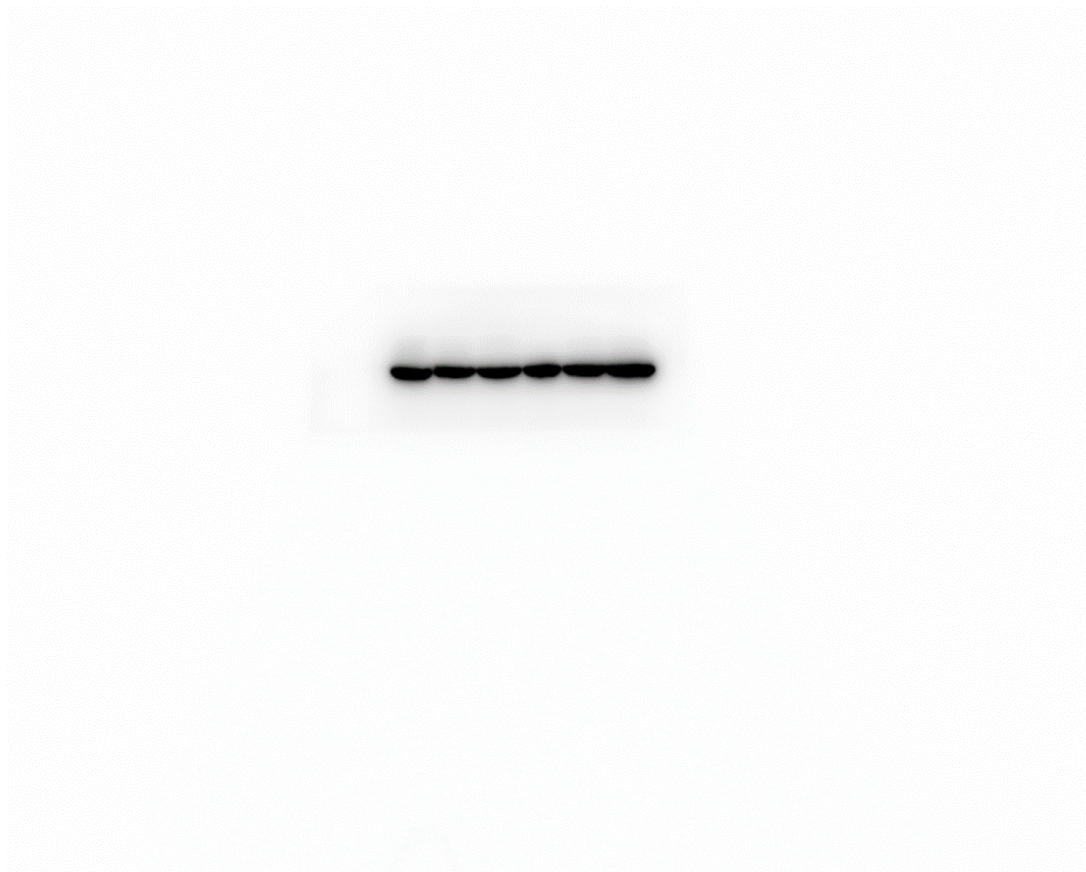

Figure 5B Z138 p-PI3K

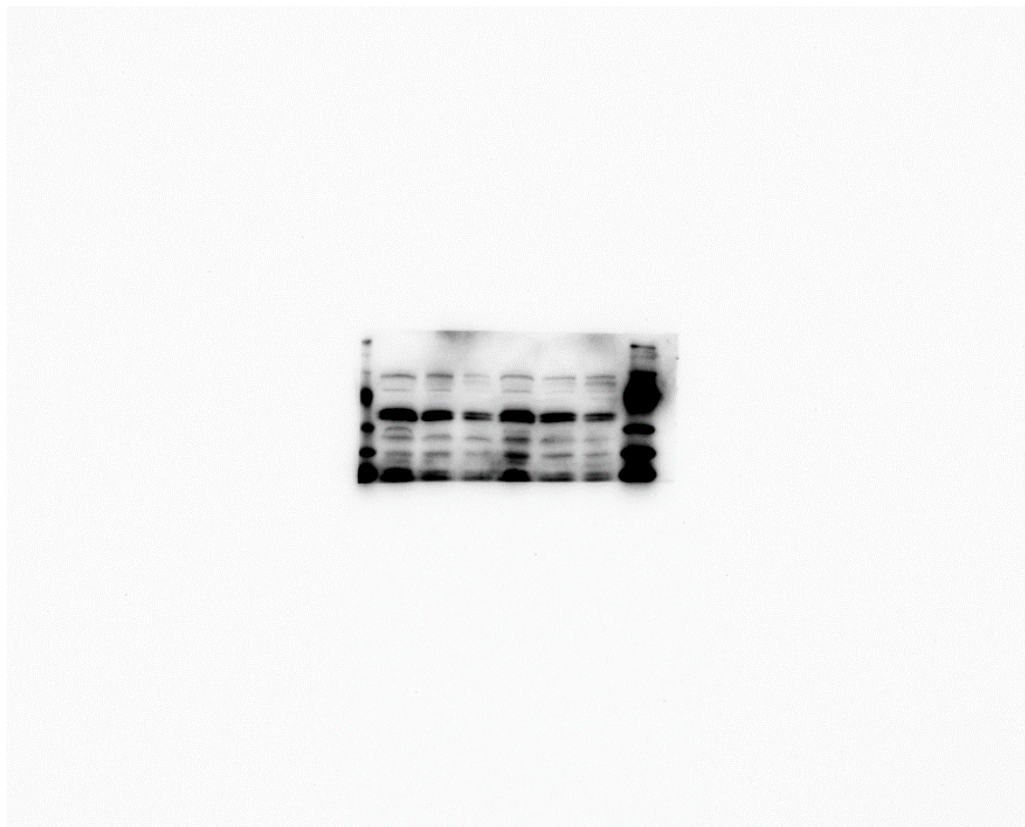



Figure 5B Z138 PI3K

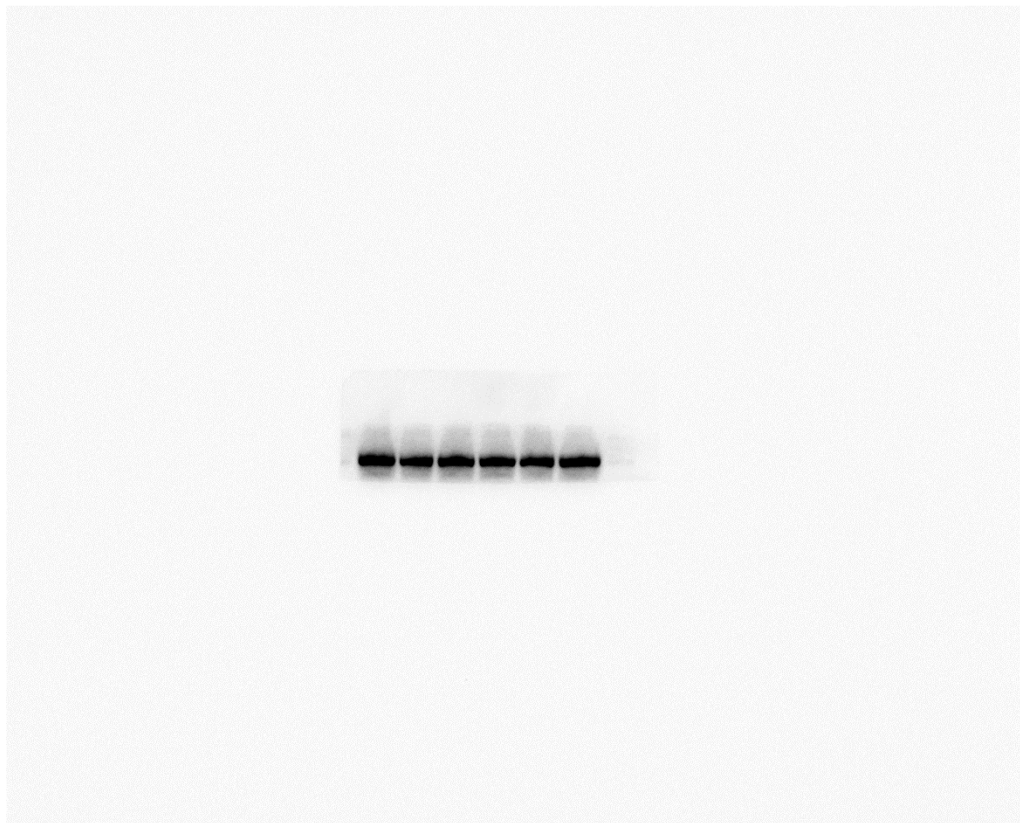

Figure 5B Z138 p-AKT

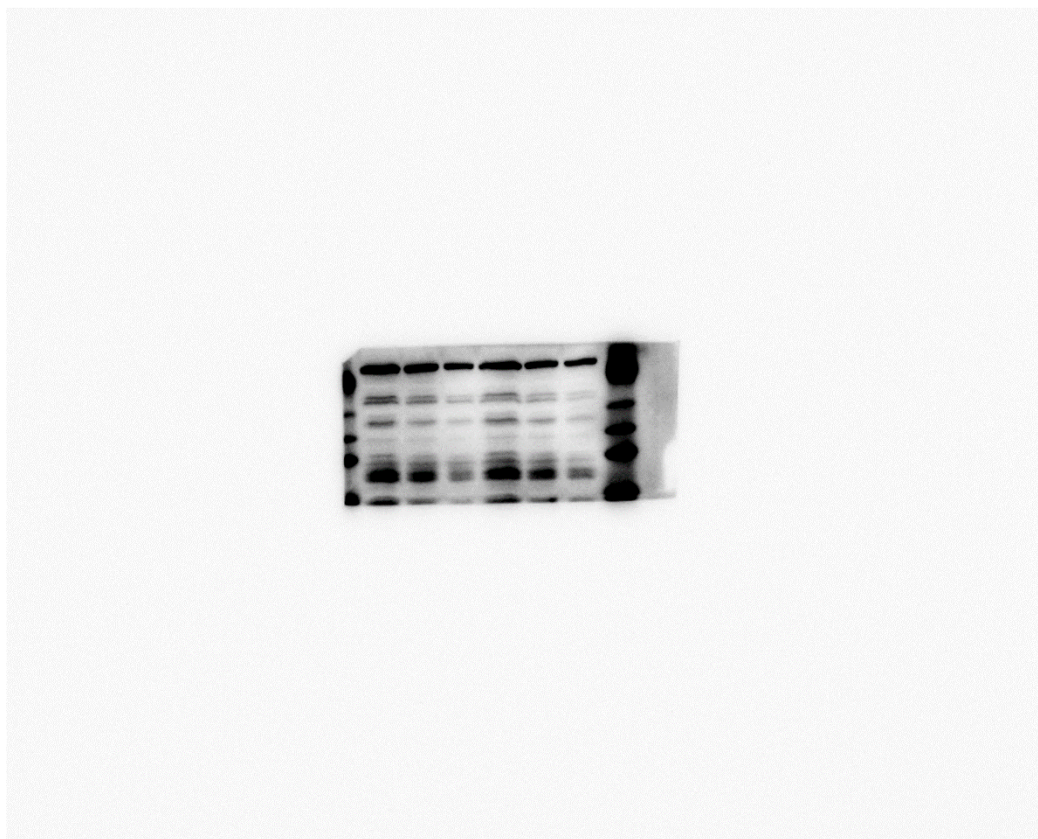

Figure 5B Z138 AKT

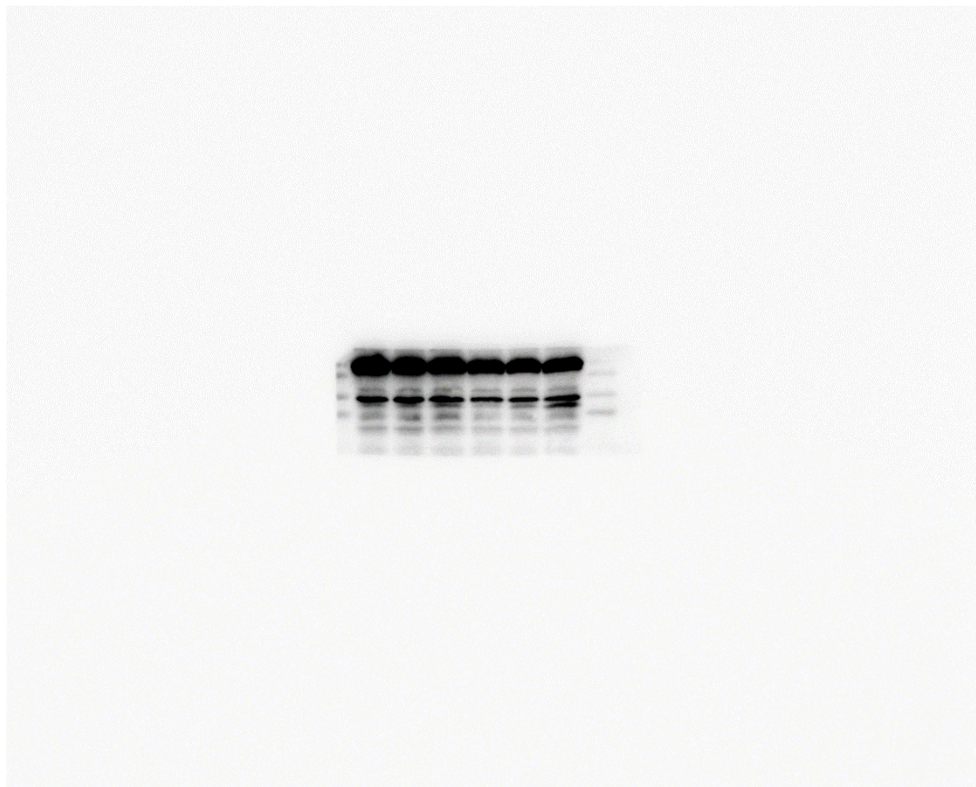

Figure 5B Z138 actin

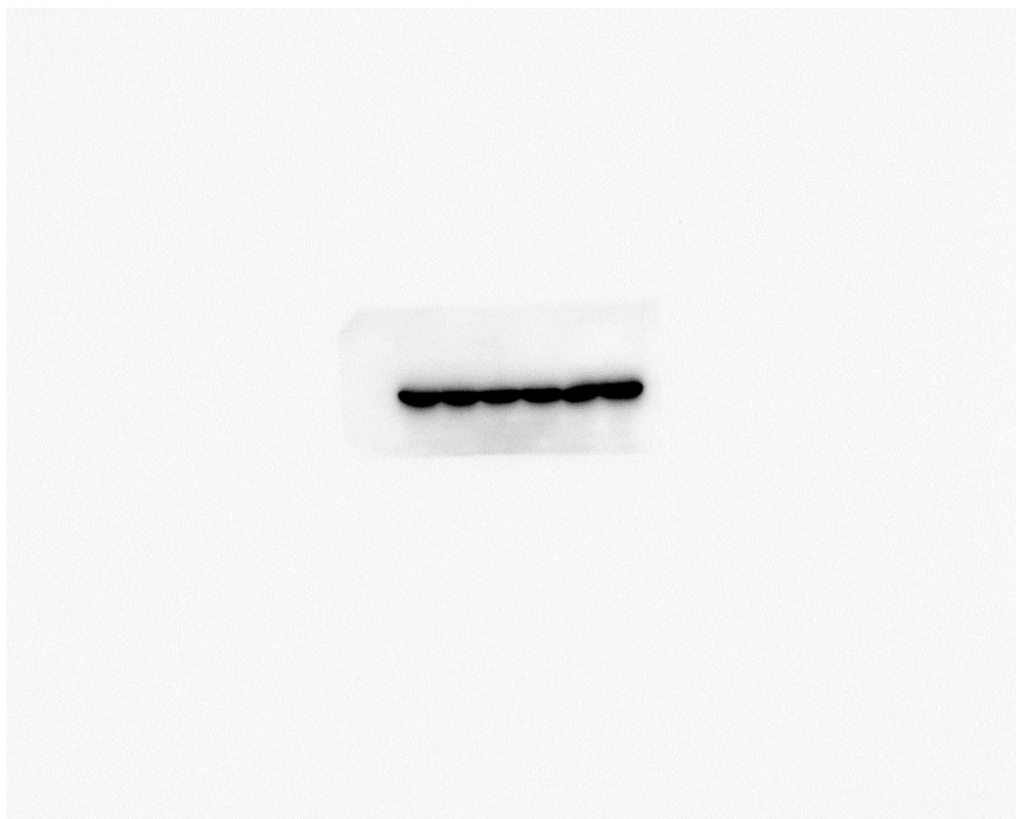



Figure 5B shZ138 p-PI3K

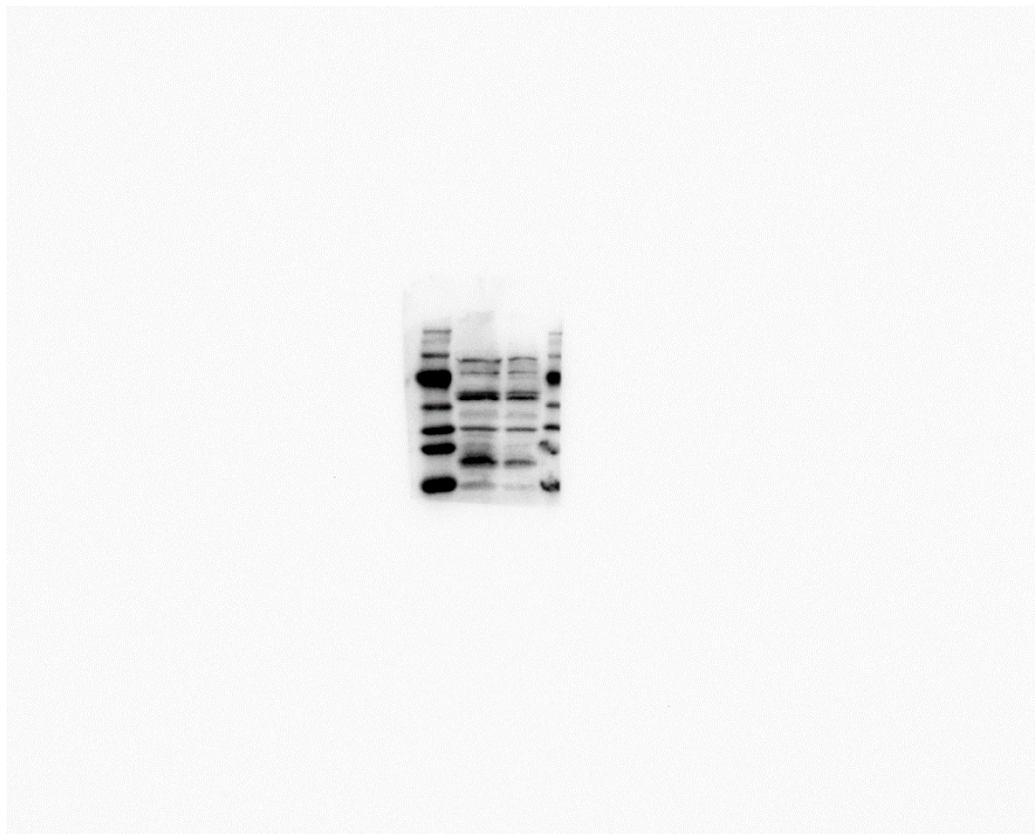



Figure 5B shZ138 PI3K

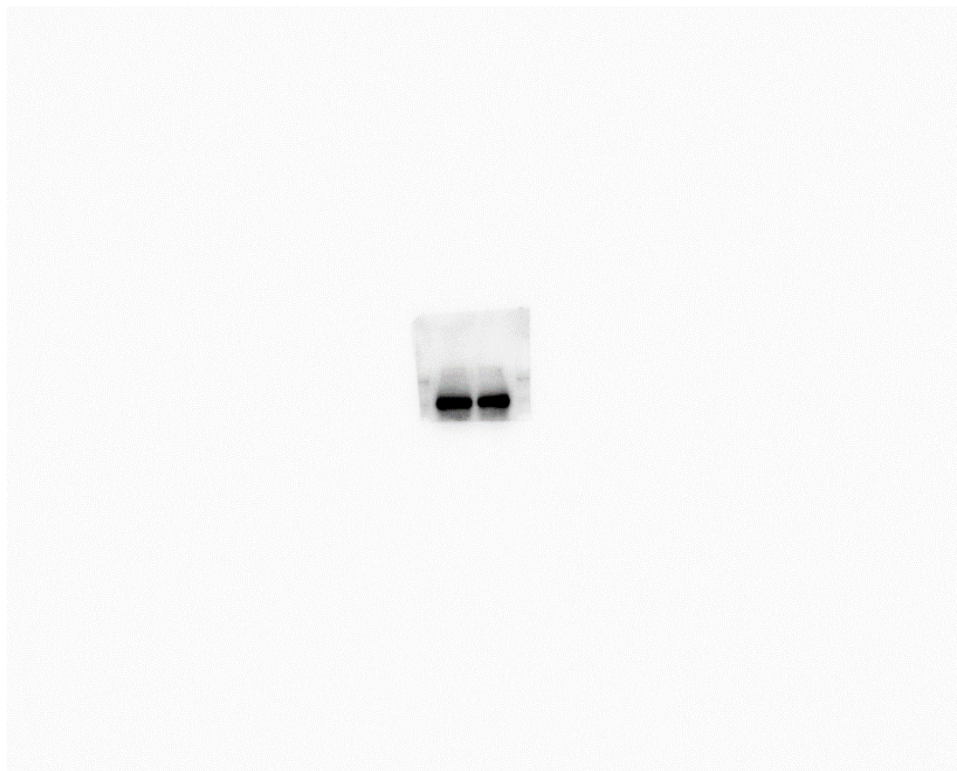

Figure 5B shZ138 p-AKT

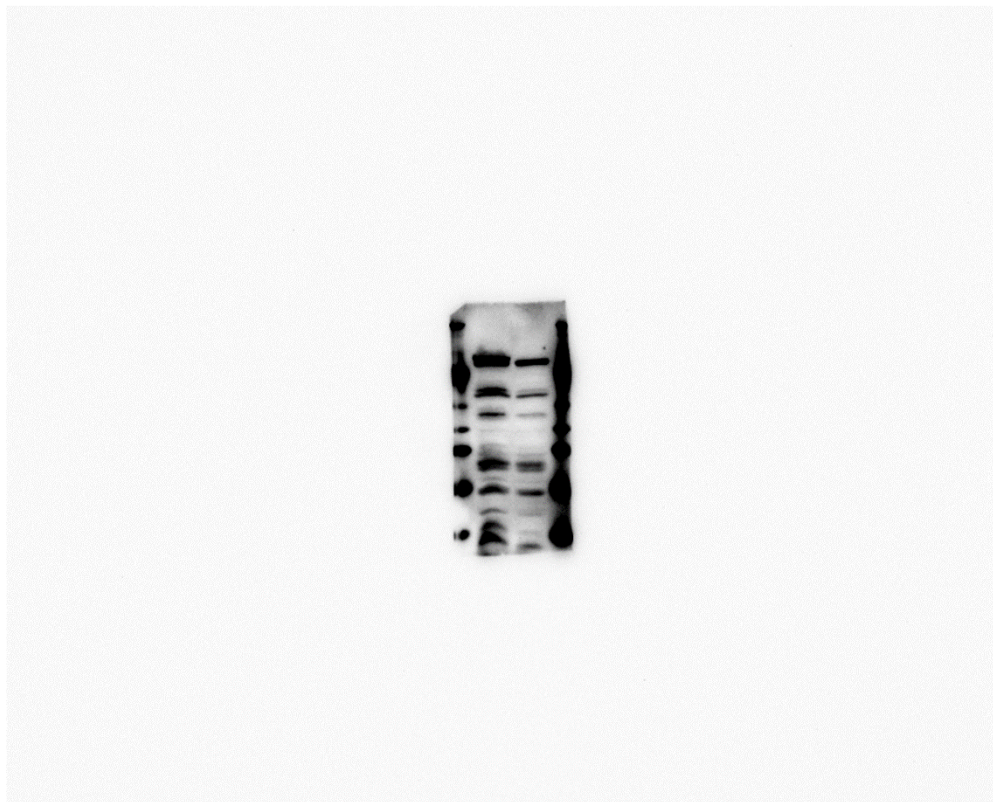

Figure 5B shZ138 AKT

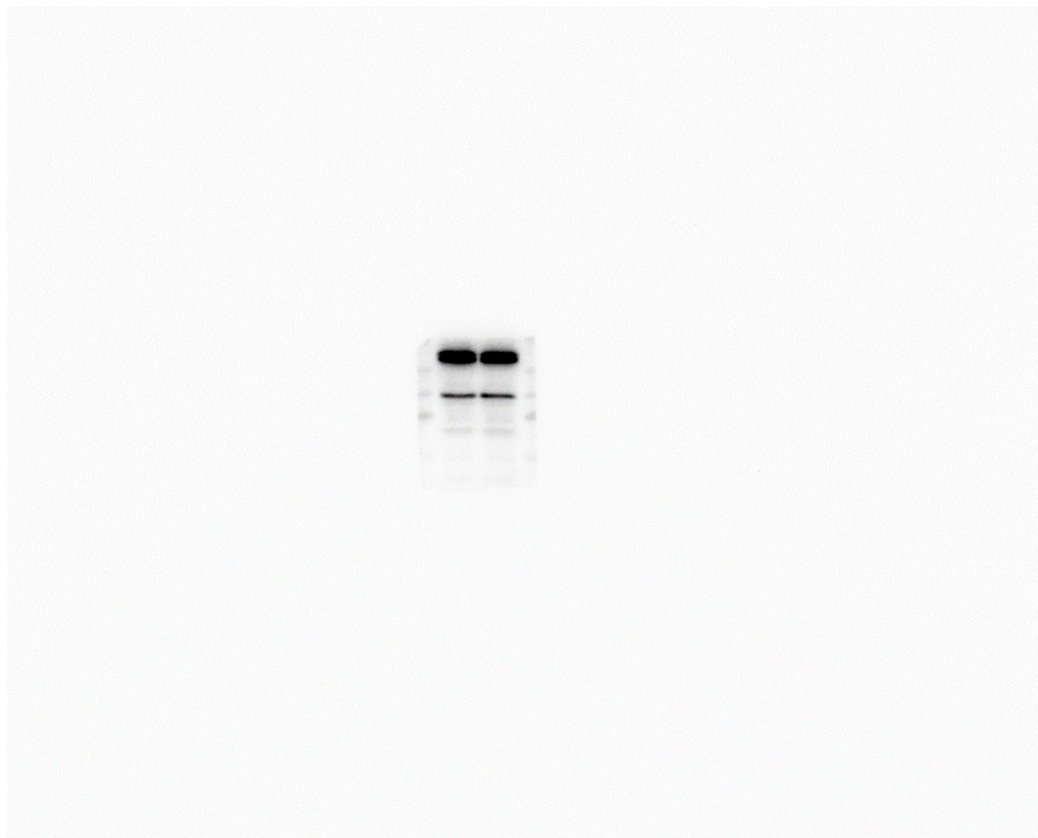

Figure 5B shZ138 actin

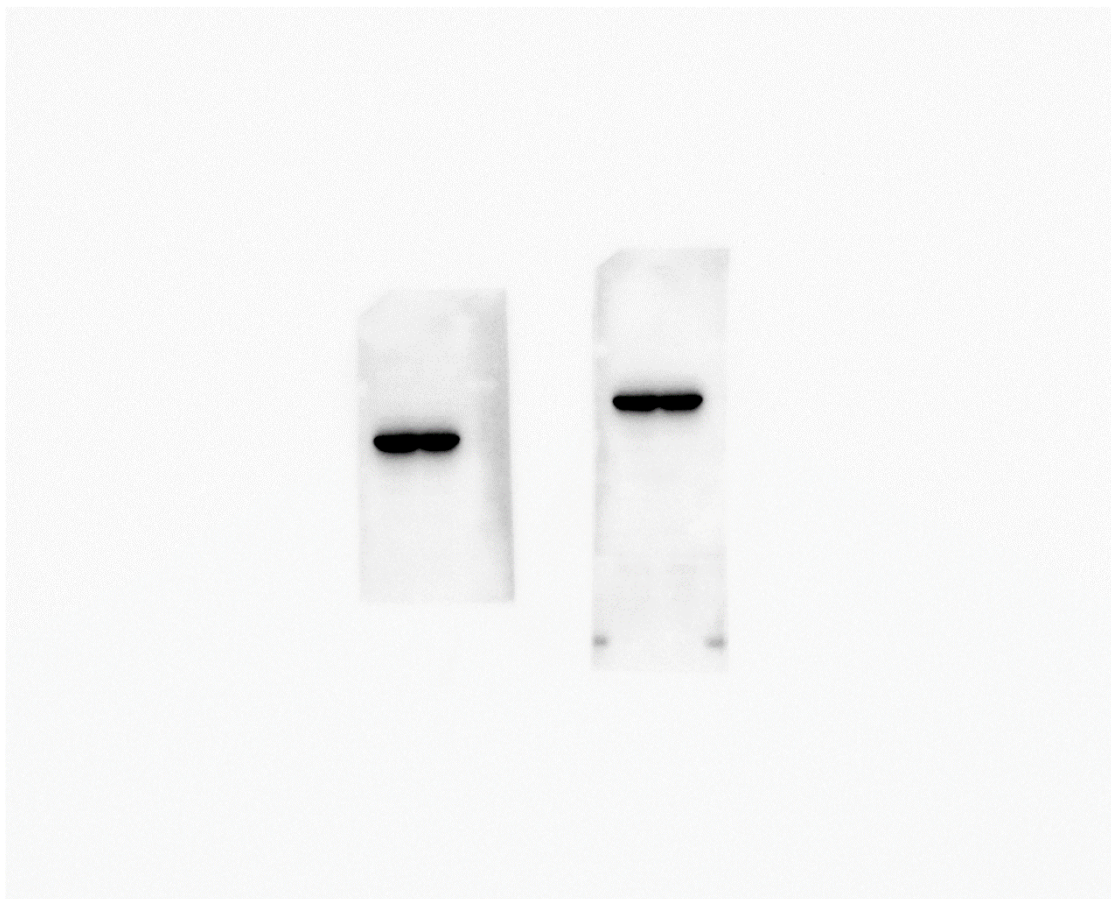

Supplement: Supplementary file 1 [file f482ee307db5141a6b26739d.pdf]
